# Supplementary material for: Observation and modelling of atmospheric OH and HO 2 radicals at a subtropical rural site and implications for secondary pollutants
Source: Copernicus journal article supplement (doi:10.5194/egusphere-2024-3210), 2024-10-18
Supplement: Supplementary file 1 [file egusphere-2024-3210-supplement.pdf]

Supporting Information for

**Observation and modelling of OH and HO<sub>2</sub> radicals at a subtropical rural site and implications for secondary pollutants**

Zhouxing Zou<sup>1#</sup>, Tianshu Chen<sup>1#</sup>, Qianjie Chen<sup>1</sup>, Weihang Sun<sup>1</sup>, Shichun Han<sup>1</sup>, Zhuoyue Ren<sup>2</sup>, Xinyi Li<sup>2</sup>, Wei Song<sup>2</sup>, Aoqi Ge<sup>2</sup>, Qi Wang<sup>2</sup>, Xiao Tian<sup>2</sup>, Chenglei Pei<sup>3</sup>, Xinming Wang<sup>2</sup>, Yanli Zhang<sup>2</sup>, and Tao Wang<sup>1</sup>

<sup>#</sup> These authors contributed equally to this work

<sup>1</sup> Department of Civil and Environmental Engineering, The Hong Kong Polytechnic University, Hong Kong, China

<sup>2</sup> Guangzhou Institute of Geochemistry, Chinese Academy of Sciences, Guangzhou, China

<sup>3</sup> Guangdong Province Guangzhou Ecological Environment Monitoring Center Station, Guangzhou 510030, China.

Correspondence to: Tao Wang ([tao.wang@polyu.edu.hk](mailto:tao.wang@polyu.edu.hk))

**Contents of this File**

14 pages

Figures: S1 to S7

Tables: S1 to S4

Text: S1 to S2

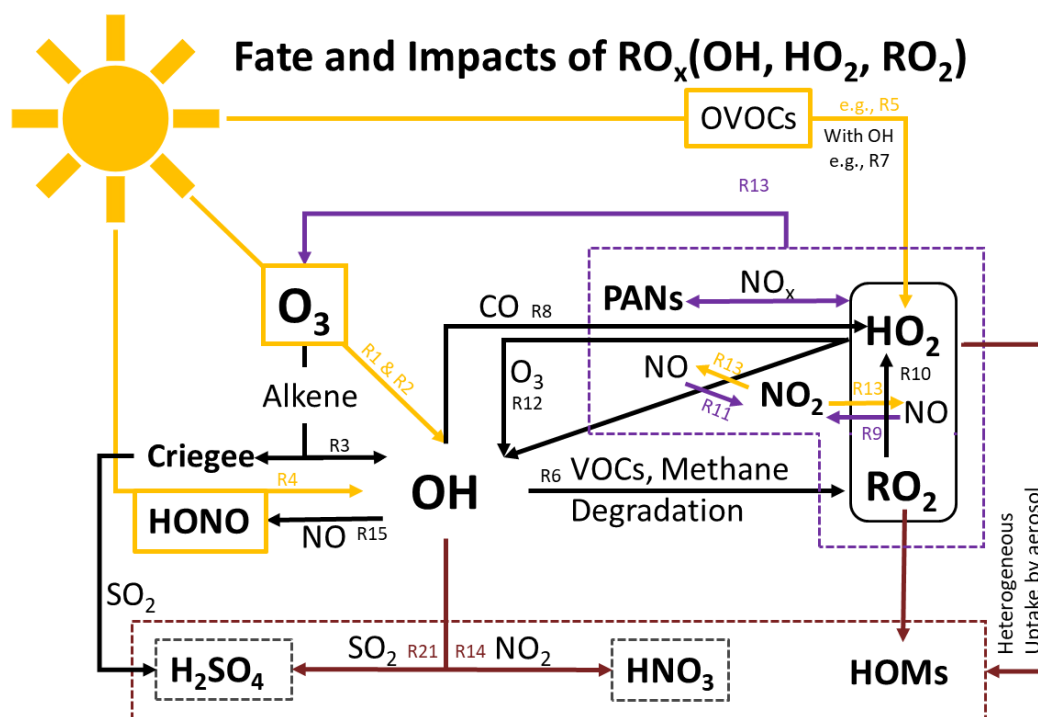

1  
 2 **Figure S1** Schematic of the RO<sub>x</sub> family's photochemical pathway. Photolysis reactions are  
 3 highlighted in yellow, reactions contributing to secondary aerosol production are marked in brown,  
 4 and reactions associated with photochemical pollution are indicated in purple. The chemical  
 5 reactions (R1 to R21) referred to Table S1.

6

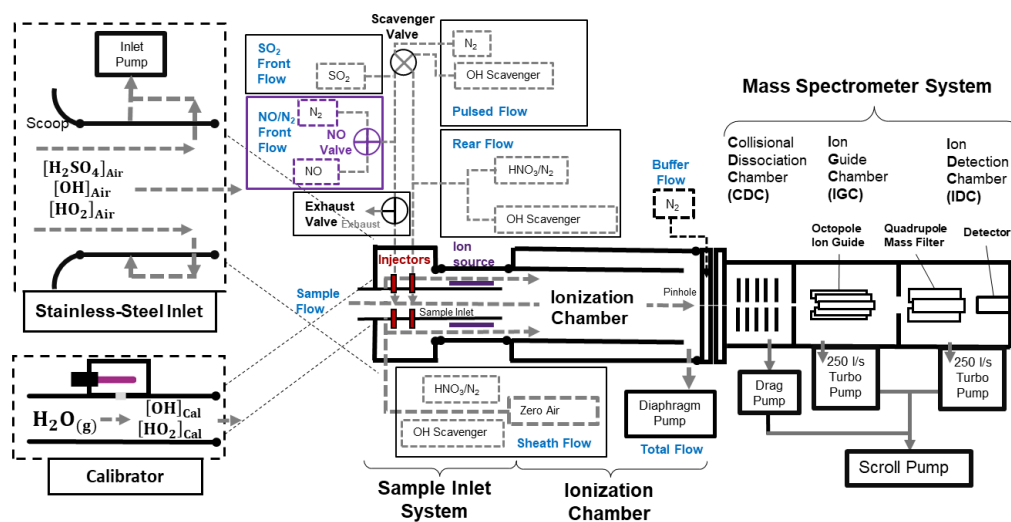

7  
 8 **Figure S2** Schematic diagram of the PolyU-CIMS system. The CIMS composed of two detachable  
 9 components: the stainless-steel inlet and the calibrator; and the main body, which includes the  
 10 sample inlet system, ionization chamber, and the mass spectrometer system. The frames labeled in  
 11 purple highlight the additional valve incorporated for HO<sub>2</sub> measurement. Further details on setup,  
 12 measurement principles of the CIMS are available in a previous study in a previous study (Zou et al., 2023)  
 13 and Text S1.

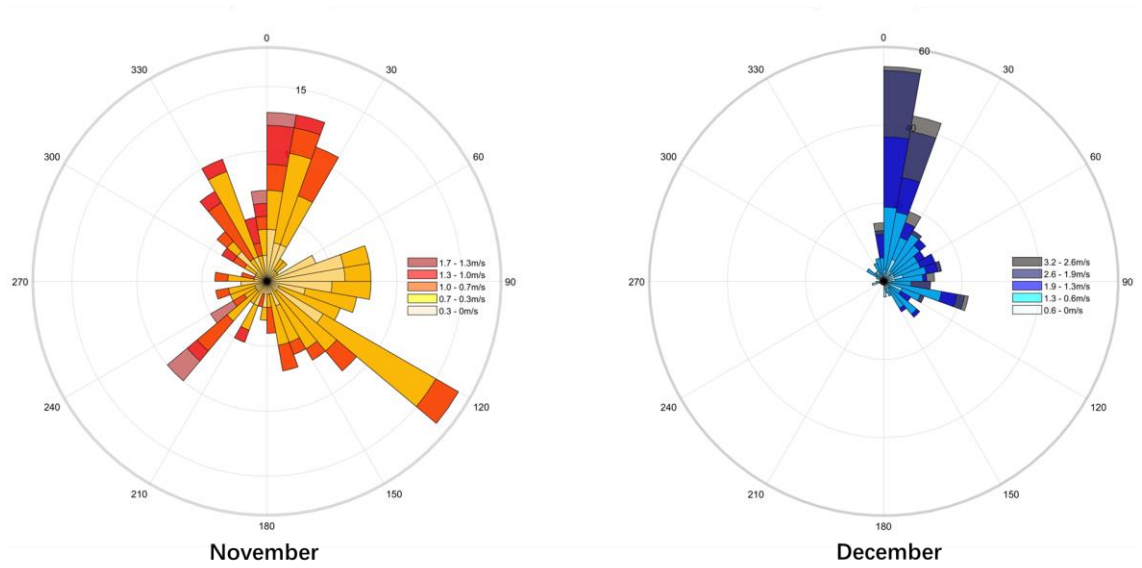

1  
2 **Figure S3** The wind rose for November and December.

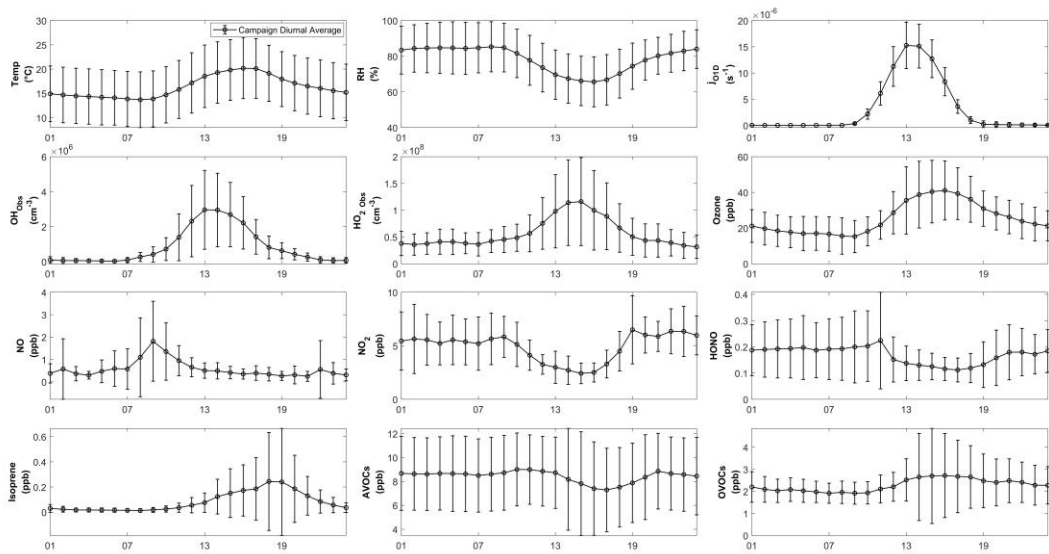

3  
4 **Figure S4** Diurnal profiles of average concentration of HO<sub>2</sub>, OH, methodology data and trace gases  
5 of the whole campaign. The shade error bars represent standard deviation of the averaged data.

6

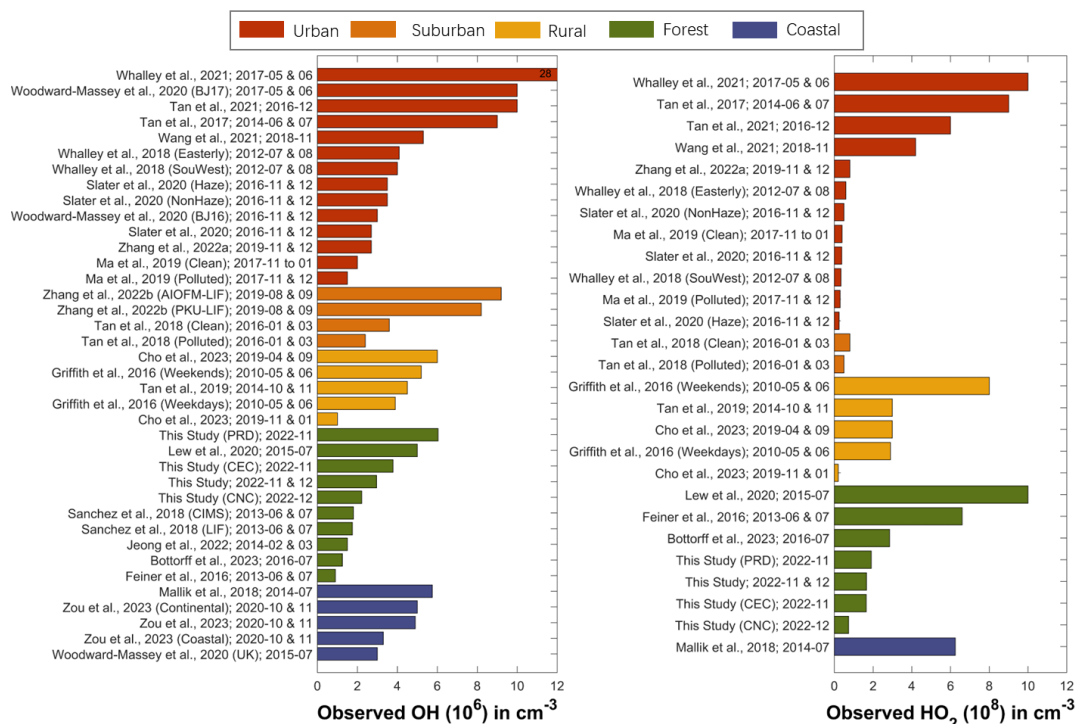

1

2 **Figure S5** Typical daily averaged maximum concentration of (a) OH and (b) HO<sub>2</sub> observed in  
 3 various geophysical regions including coastal (blue), forest (green), rural (yellow) and urban (red).

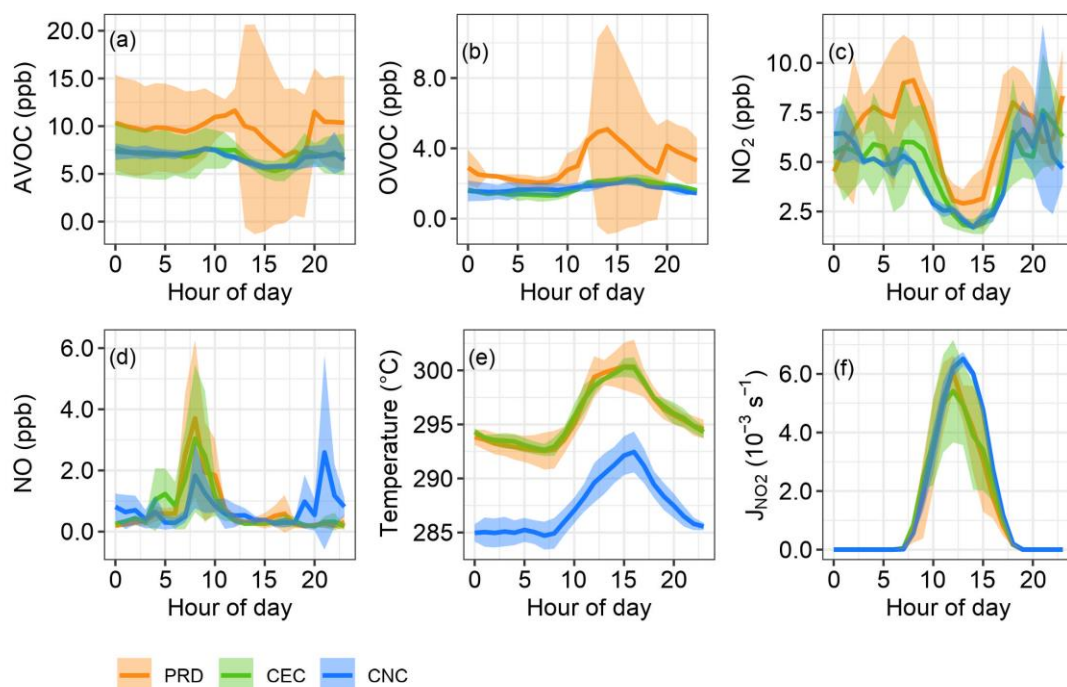

4

5 **Figure S6** Average diurnal variations of (a) AVOC, (b) OVOC, (c) NO<sub>2</sub>, (d) NO, (e) Temperature,  
 6 and (f) J<sub>NO2</sub>. The solid-colored lines represent selected cases: orange for PRD, green for CEC, and  
 7 blue for CNC. The light band represents the standard deviations of the mean.

8

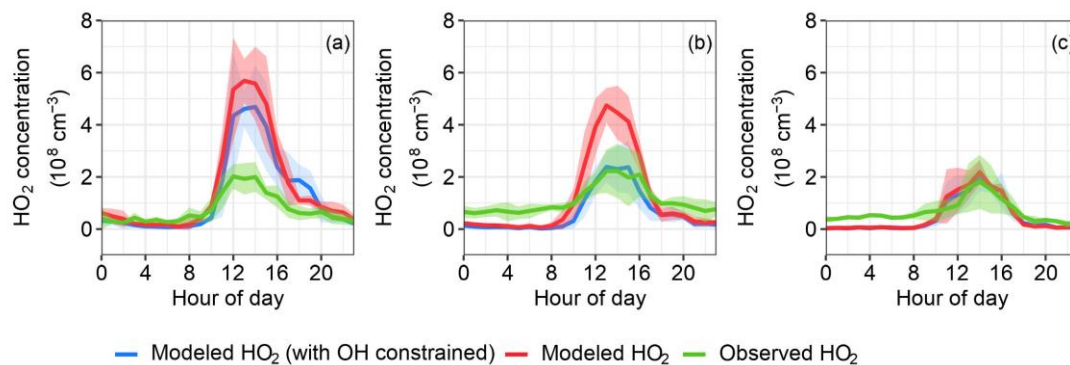

1

2 **Figure S7** Average diurnal variations of HO<sub>2</sub> for PRD (a), CEC (b), and CNC (c) from observational  
 3 and modeling results. The solid line represents the average value, while the shaded area indicates  
 4 one standard deviation. The green line represents the observational results, the red line shows the  
 5 modeled results without constraining the observed OH concentration (base scenario), and the blue  
 6 line shows the modeled results with the observed OH concentration constrained.

7 **Table S1** The HO<sub>x</sub> related reactions in the model.

| <b>Ambient: HO<sub>x</sub> Productions</b>                 |                                                                                                                                                                                                                                                        |
|------------------------------------------------------------|--------------------------------------------------------------------------------------------------------------------------------------------------------------------------------------------------------------------------------------------------------|
| (R1)                                                       | $O_3 + h\nu(<340 \text{ nm}) \rightarrow O(^1D) + O_2$                                                                                                                                                                                                 |
| (R2)                                                       | $O(^1D) + H_2O \rightarrow OH + OH$                                                                                                                                                                                                                    |
| (R3)                                                       | Alkenes + O <sub>3</sub> → RO <sub>x</sub> + Products                                                                                                                                                                                                  |
| (R4)                                                       | HONO + hν(<400 nm) → OH + NO                                                                                                                                                                                                                           |
| (R5)                                                       | HCHO + hν (<335 nm) + 2O <sub>2</sub> → 2HO <sub>2</sub> + CO                                                                                                                                                                                          |
| <b>Ambient: HO<sub>x</sub> Interconversions</b>            |                                                                                                                                                                                                                                                        |
| (R6)                                                       | OH + RH + O <sub>2</sub> → RO <sub>2</sub> + H <sub>2</sub> O                                                                                                                                                                                          |
| (R7)                                                       | HCHO + OH + O <sub>2</sub> → CO + H <sub>2</sub> O + HO <sub>2</sub>                                                                                                                                                                                   |
| (R8)                                                       | CO + OH + O <sub>2</sub> → CO <sub>2</sub> + HO <sub>2</sub>                                                                                                                                                                                           |
| (R9)                                                       | RO <sub>2</sub> + NO → RO + NO <sub>2</sub>                                                                                                                                                                                                            |
| (R10)                                                      | RO + O <sub>2</sub> → R'CHO + HO <sub>2</sub>                                                                                                                                                                                                          |
| (R11)                                                      | HO <sub>2</sub> + NO → OH + NO <sub>2</sub>                                                                                                                                                                                                            |
| (R12)                                                      | HO <sub>2</sub> + O <sub>3</sub> → OH + 2O <sub>2</sub>                                                                                                                                                                                                |
| (R13)                                                      | NO <sub>2</sub> + hν(<420 nm) + O <sub>2</sub> → NO + O <sub>3</sub>                                                                                                                                                                                   |
| <b>Ambient: HO<sub>x</sub> Loss</b>                        |                                                                                                                                                                                                                                                        |
| (R14)                                                      | OH + NO <sub>2</sub> → HNO <sub>3</sub>                                                                                                                                                                                                                |
| (R15)                                                      | OH + NO → HONO                                                                                                                                                                                                                                         |
| (R16)                                                      | RO <sub>2</sub> + NO → RONO <sub>2</sub>                                                                                                                                                                                                               |
| (R17)                                                      | RO <sub>2</sub> + RO <sub>2</sub> → products                                                                                                                                                                                                           |
| (R18)                                                      | RO <sub>2</sub> + HO <sub>2</sub> → ROOH + O <sub>2</sub>                                                                                                                                                                                              |
| (R19)                                                      | HO <sub>2</sub> + HO <sub>2</sub> → H <sub>2</sub> O <sub>2</sub> + O <sub>2</sub>                                                                                                                                                                     |
| (R20)                                                      | HO <sub>2</sub> + HO <sub>2</sub> + H <sub>2</sub> O → H <sub>2</sub> O <sub>2</sub> + H <sub>2</sub> O + O <sub>2</sub>                                                                                                                               |
| (R21)                                                      | OH + SO <sub>2</sub> + O <sub>2</sub> + H <sub>2</sub> O + M → H <sub>2</sub> SO <sub>4</sub> + HO <sub>2</sub> + M                                                                                                                                    |
| <b>CIMS: Reactions in Sample Inlet System</b>              |                                                                                                                                                                                                                                                        |
| (R21)                                                      | OH + SO <sub>2</sub> + O <sub>2</sub> + H <sub>2</sub> O + M → H <sub>2</sub> SO <sub>4</sub> + HO <sub>2</sub> + M                                                                                                                                    |
| (R11)                                                      | HO <sub>2</sub> + NO → OH + NO <sub>2</sub>                                                                                                                                                                                                            |
| (R22)                                                      | RO <sub>2</sub> + NO + O <sub>2</sub> → R'CHO + HO <sub>2</sub> + NO <sub>2</sub>                                                                                                                                                                      |
| (R23)                                                      | Scavenger gas + OH → Products                                                                                                                                                                                                                          |
| <b>CIMS: Reactions in Ionization Chamber</b>               |                                                                                                                                                                                                                                                        |
| (R24)                                                      | HNO <sub>3</sub> + e <sup>-</sup> → NO <sub>2</sub> <sup>-</sup> + OH                                                                                                                                                                                  |
| (R25)                                                      | HNO <sub>3</sub> + NO <sub>2</sub> <sup>-</sup> → NO <sub>3</sub> <sup>-</sup> + HONO                                                                                                                                                                  |
| (R26)                                                      | NO <sub>3</sub> <sup>-</sup> + (HNO <sub>3</sub> ) <sub>m</sub> + (H <sub>2</sub> O) <sub>n</sub> + M → NO <sub>3</sub> <sup>-</sup> ·(HNO <sub>3</sub> ) <sub>m</sub> ·(H <sub>2</sub> O) <sub>n</sub> + M                                            |
| (R27)                                                      | H <sub>2</sub> SO <sub>4</sub> + NO <sub>3</sub> <sup>-</sup> ·(HNO <sub>3</sub> ) <sub>m</sub> ·(H <sub>2</sub> O) <sub>n</sub> → HSO <sub>4</sub> <sup>-</sup> ·(HNO <sub>3</sub> ) <sub>m</sub> ·(H <sub>2</sub> O) <sub>n</sub> + HNO <sub>3</sub> |
| <b>CIMS: Reactions in Collisional Dissociation Chamber</b> |                                                                                                                                                                                                                                                        |
| (R28)                                                      | NO <sub>3</sub> <sup>-</sup> ·(HNO <sub>3</sub> ) <sub>m</sub> ·(H <sub>2</sub> O) <sub>n</sub> + M → NO <sub>3</sub> <sup>-</sup> + (HNO <sub>3</sub> ) <sub>m</sub> + (H <sub>2</sub> O) <sub>n</sub> + M                                            |
| (R29)                                                      | HSO <sub>4</sub> <sup>-</sup> ·(HNO <sub>3</sub> ) <sub>m</sub> ·(H <sub>2</sub> O) <sub>n</sub> + M → HSO <sub>4</sub> <sup>-</sup> + (HNO <sub>3</sub> ) <sub>m</sub> + (H <sub>2</sub> O) <sub>n</sub> + M                                          |
| <b>CIMS: Calibration</b>                                   |                                                                                                                                                                                                                                                        |
| (R30)                                                      | H <sub>2</sub> O + hv(184.9nm) + O <sub>2</sub> → HO <sub>2</sub> + OH                                                                                                                                                                                 |

1  
2  
3  
4  
5

**Table S2** Overview of instruments used, and species measured during the field campaign.

| <b>Instruments</b>                     | <b>Species</b>    | <b>Resolution</b> | <b>Detection Limits</b>               | <b>Accuracy</b> |
|----------------------------------------|-------------------|-------------------|---------------------------------------|-----------------|
| Q-CIMS (NO <sub>3</sub> <sup>-</sup> ) | OH                | 1 hours           | 3 × 10 <sup>5</sup> cm <sup>-3</sup>  | ± 46%           |
|                                        | HO <sub>2</sub>   | 1 hours           | 20 × 10 <sup>5</sup> cm <sup>-3</sup> | ± 44%           |
| Thermo 42i-TL                          | NO                | 1 min             | 60 ppt                                | ± 5.2%          |
| Thermo 49i                             | O <sub>3</sub>    | 1 min             | 0.5 ppb                               | ± 6.0%          |
| NO <sub>2</sub> -11r-EP                | NO <sub>2</sub>   | 1 min             | 60 ppt                                | ± 6.0%          |
| Online GC-MS                           | VOCs              | 1 hour            | 10 ppt                                | ± 20%           |
| Thermo 43i                             | SO <sub>2</sub>   | 1 min             | 1 ppb                                 | ± 6.1%          |
| Thermo 48i                             | CO                | 1 min             | 40 ppb                                | ± 7.4%          |
| Thermo 17i                             | NH <sub>3</sub>   | 2 mins            | 1 ppb                                 | ± 8%            |
| SMPS                                   | Aerosol Particles | 5 mins            | 1 particle cm <sup>-3</sup>           | ± 10%           |

1

1 **Table S3** Configurations of the PolyU CIMS in Hok Tsui 2020 and Conghua 2022 campaigns. The changes compare to last configuration were labelled by red color.

| a) Hok Tsui 2020         |                         |                                       |           |                                           |                                                                             |                       | b) CongHua 2022   |                                   |                                       |                                       |                                    |                                                |                                              |                       |                 |
|--------------------------|-------------------------|---------------------------------------|-----------|-------------------------------------------|-----------------------------------------------------------------------------|-----------------------|-------------------|-----------------------------------|---------------------------------------|---------------------------------------|------------------------------------|------------------------------------------------|----------------------------------------------|-----------------------|-----------------|
| Efficiency Related       | Parameter:              | Gas                                   | Values    | Units                                     | Specification for Measurement                                               | Values                | Units             | Efficiency Related                | Parameter:                            | Gas                                   | Values                             | Units                                          | Specification for Measurement                | Values                | Units           |
| <b>E<sub>Conv</sub></b>  | <b>Front Injection</b>  | SO <sub>2</sub> (0.9%)                | 5         | sccm                                      | Sample Flow [SO <sub>2</sub> ]                                              | 12                    | ppm               | <b>E<sub>Conv</sub></b>           | <b>Front Injection</b>                | SO <sub>2</sub> (0.9%)                | 5                                  | sccm                                           | Sample Flow [SO <sub>2</sub> ]               | 12                    | ppm             |
|                          |                         | NO (0.9%)                             | 0.5       | sccm                                      | Sample Flow [NO]                                                            | 1.2                   | ppm               |                                   |                                       |                                       |                                    |                                                |                                              |                       |                 |
|                          | <b>Pulse Valve</b>      | N <sub>2</sub>                        | 2         | sccm                                      | Cycle Duration (OH)                                                         | 6                     | mins              | <b>E<sub>Conv</sub></b>           | <b>Pulse Valve</b>                    | N <sub>2</sub>                        | 2                                  | sccm                                           | Cycle Duration (OH)                          | 6                     | mins            |
|                          |                         | C <sub>3</sub> F <sub>6</sub> (99.9%) | 2         | sccm                                      | Scavenging Efficiency (OH)                                                  | 92%                   |                   |                                   |                                       | Cycle Duration (HO <sub>2</sub> )     | 60                                 | mins                                           |                                              |                       |                 |
|                          | <b>Rear Injection</b>   | C <sub>3</sub> F <sub>6</sub> (99.9%) | 2         | sccm                                      | Sample Flow [C <sub>3</sub> F <sub>6</sub> ]                                | 1072                  | ppm               | <b>Rear Injection</b>             | C <sub>3</sub> F <sub>6</sub> (99.9%) | 2                                     | sccm                               | Sample Flow [C <sub>3</sub> F <sub>6</sub> ]   | 1072                                         | ppm                   |                 |
|                          | HNO <sub>3</sub>        | 10                                    | sccm      | Reaction Time                             | 47                                                                          | ms                    |                   | HNO <sub>3</sub>                  | 10                                    | sccm                                  | Reaction Time                      | 47                                             | ms                                           |                       |                 |
|                          | <b>Sample Flow</b>      | 3.7                                   | slpm      | Sample Flow Speed                         | 55                                                                          | cm/s                  |                   | <b>Sample Flow</b>                | 3.7                                   | slpm                                  | Sample Flow Speed                  | 55                                             | cm/s                                         |                       |                 |
| <b>E<sub>Ion</sub></b>   | <b>Sheath Flow</b>      | Zero Air                              | 12.6      | slpm                                      | Reynolds Number in Ionization Chamber                                       | >4000                 | Turbulent flows   | <b>E<sub>Ion</sub></b>            | <b>Sheath Flow</b>                    | Zero Air                              | 12.6                               | slpm                                           | Reynolds Number in Ionization Chamber        | >4000                 | Turbulent flows |
|                          |                         | HNO <sub>3</sub>                      | 10        | sccm                                      |                                                                             |                       |                   |                                   |                                       | HNO <sub>3</sub>                      | 10                                 | sccm                                           |                                              |                       |                 |
|                          |                         | C <sub>3</sub> F <sub>6</sub> (99.9%) | 2         | sccm                                      | Sheath Flow [C <sub>3</sub> F <sub>6</sub> ]                                | 159                   | ppm               |                                   |                                       | C <sub>3</sub> F <sub>6</sub> (99.9%) | 2                                  | sccm                                           | Sheath Flow [C <sub>3</sub> F <sub>6</sub> ] | 159                   | ppm             |
|                          | <b>Total Flow</b>       | 16.8                                  | slpm      | Sheath Flow Speed                         | 25                                                                          | cm/s                  | <b>Total Flow</b> | 16.8                              | slpm                                  | Sheath Flow Speed                     | 25                                 | cm/s                                           |                                              |                       |                 |
|                          | <b>Sheath Voltages</b>  | -80                                   | V         | Voltages Difference for ionization        | 48                                                                          | V                     |                   | <b>Sheath Voltages</b>            | -80                                   | V                                     | Voltages Difference for ionization | 48                                             | V                                            |                       |                 |
|                          | <b>Sample Voltages</b>  | -32                                   | V         |                                           |                                                                             |                       |                   | <b>Sample Voltages</b>            | -32                                   | V                                     |                                    |                                                |                                              |                       |                 |
| <b>E<sub>Trans</sub></b> | <b>Buffer Gas</b>       | N <sub>2</sub>                        | 440       | sccm                                      | Voltages Difference for transmission                                        | 80                    | V                 | <b>E<sub>Trans</sub></b>          | <b>Buffer Gas</b>                     | N <sub>2</sub>                        | 440                                | sccm                                           | Voltages Difference for transmission         | 80                    | V               |
|                          | <b>Buffer Voltages</b>  | -70                                   | V         |                                           |                                                                             |                       |                   |                                   | <b>Buffer Voltages</b>                | -70                                   | V                                  |                                                |                                              |                       |                 |
|                          | <b>Pinhole Voltages</b> | -40                                   | V         |                                           |                                                                             |                       |                   |                                   | <b>Pinhole Voltages</b>               | -40                                   | V                                  |                                                |                                              |                       |                 |
| <b>Cal</b>               | <b>Calibration Flow</b> | 10                                    | slpm      | Calibration Factor                        | C <sub>OH</sub> (Reagent ion: N <sup>18</sup> O <sub>3</sub> <sup>-</sup> ) | 1.21*10 <sup>-6</sup> | cm <sup>3</sup>   | <b>Cal</b>                        | <b>Calibration Flow</b>               | 10                                    | slpm                               | Calibration Factors                            | C <sub>OH</sub>                              | 1.09*10 <sup>-6</sup> | cm <sup>3</sup> |
|                          | <b>Flow Speed</b>       | 65                                    | cm/s      |                                           |                                                                             |                       |                   |                                   | <b>Flow Speed</b>                     | 65                                    | cm/s                               | C <sub>HO2</sub>                               | 1.07*10 <sup>-6</sup>                        |                       |                 |
|                          | <b>Product It Value</b> | 8.8*10 <sup>10</sup>                  | photon/cm |                                           |                                                                             |                       |                   |                                   | <b>Product It Value</b>               | 8.8*10 <sup>10</sup>                  | photon/cm                          | (N <sup>18</sup> O <sub>3</sub> <sup>-</sup> ) | C <sub>H2SO4</sub>                           | 6.01*10 <sup>-6</sup> |                 |
| <b>Uncertainties</b>     | <b>Sigma</b>            | 2                                     |           | <b>Detection Limit</b>                    | In lab                                                                      | 1.7                   |                   | <b>Overall Uncertainties (2σ)</b> | OH                                    | 46%                                   |                                    | <b>Detection Limit in Field Study</b>          | OH                                           | 3                     |                 |
|                          | <b>Calibration</b>      | 38%                                   |           | (×10 <sup>5</sup> cm <sup>-3</sup> ) (3σ) | Day                                                                         | 12                    |                   |                                   | H <sub>2</sub> SO <sub>4</sub>        | 40%                                   |                                    |                                                | H <sub>2</sub> SO <sub>4</sub>               | 1                     |                 |
|                          | <b>Overall</b>          | 44%                                   |           |                                           | Night                                                                       | 8.5                   |                   |                                   | HO <sub>2</sub>                       | 44%                                   |                                    |                                                | HO <sub>2</sub>                              | 20                    |                 |

2



1 **Table S4** Average concentrations and standard deviation of measured VOCs that are constrained in  
 2 the box model in the entire campaign and in different cases.

| Species                   | Total         | PRD            | CEC           | CNC            | MCM Abb.    |
|---------------------------|---------------|----------------|---------------|----------------|-------------|
| Ethane                    | 2.3±0.83      | 2.2±1.2        | 2.4±0.89      | 2.3±0.62       | C2H6        |
| Ethylene                  | 0.69±0.33     | 0.72±0.32      | 0.85±0.47     | 0.59±0.23      | C2H4        |
| Propane                   | 1.6±0.62      | 2.2±0.71       | 1.6±0.61      | 1.4±0.46       | C3H8        |
| Propene                   | 0.072±0.077   | 0.11±0.15      | 0.074±0.051   | 0.055±0.032    | C3H6        |
| i-Butane                  | 0.44±0.28     | 0.8±0.46       | 0.45±0.15     | 0.31±0.094     | IC4H10      |
| n-Butane                  | 0.65±0.41     | 1.2±0.65       | 0.64±0.25     | 0.48±0.16      | NC4H10      |
| Acetylene                 | 0.92±0.42     | 1.1±0.46       | 1.1±0.46      | 0.78±0.35      | C2H2        |
| trans-2-Butene            | 0.015±0.0071  | 0.015±0.0057   | 0.018±0.01    | 0.014±0.0057   | TBUT2ENE    |
| cis-2-Butene              | 0.083±0.038   | 0.14±0.047     | 0.08±0.013    | 0.066±0.017    | CBUT2ENE    |
| Butene                    | 0.044±0.021   | 0.044±0.044    | 0.043±0.015   | 0.044±0.0098   | BUT1ENE     |
| Chloromethane             | 0.84±0.22     | 0.66±0.28      | 0.88±0.15     | 0.86±0.2       | CH3CL       |
| 1,3-Butadiene             | 0.0079±0.0078 | 0.011±0.0087   | 0.011±0.012   | 0.0051±0.0036  | C4H6        |
| Acetaldehyde              | 0.92±0.35     | 1.5±0.37       | NaN           | 0.82±0.27      | CH3CHO      |
| Bromomethane              | 0.0093±0.0022 | 0.011±0.0022   | 0.01±0.0022   | 0.0083±0.0018  | CH3BR       |
| Chloroethane              | 0.023±0.012   | 0.022±0.016    | 0.026±0.011   | 0.021±0.011    | CH3CH2CL    |
| i-Pentane                 | 0.34±0.17     | 0.57±0.21      | 0.39±0.11     | 0.24±0.061     | IC5H12      |
| 1-Pentene                 | 0.043±0.016   | 0.062±0.023    | 0.042±0.014   | 0.037±0.0081   | PENT1ENE    |
| n-Pentane                 | 0.19±0.1      | 0.3±0.17       | 0.17±0.069    | 0.15±0.049     | NC5H12      |
| trans-2-Pentene           | 0.0032±0.0045 | 0.0098±0.0055  | 0.0041±0.0038 | 0.0083±0.0076  | TPENT2ENE   |
| Isoprene                  | 0.082±0.17    | 0.22±0.3       | 0.14±0.17     | 0.016±0.019    | C5H8        |
| cis-2-Pentene             | 0.0017±0.0028 | 0.0061±0.0032  | 0.0022±0.002  | 0.0023±0.0044  | CPENT2ENE   |
| Acrolein                  | 0.06±0.031    | 0.095±0.04     | 0.065±0.029   | 0.05±0.019     | ACR         |
| Propanal                  | 0.011±0.0059  | 0.015±0.0099   | 0.011±0.0044  | 0.011±0.0039   | C2H5CHO     |
| Vinylidene chloride       | 0.0036±0.0027 | 0.0031±0.0015  | 0.0025±0.0019 | 0.0035±0.0022  | CCL2CH2     |
| 2,2-Dimethylbutane        | 0.017±0.015   | 0.039±0.025    | 0.017±0.0064  | 0.0098±0.0018  | M22C4       |
| Dichloromethane           | 1.1±0.84      | 2.2±1.3        | 1.2±0.37      | 0.75±0.33      | CH2CL2      |
| 2,3-Dimethylbutane        | 0.026±0.023   | 0.058±0.031    | 0.033±0.017   | 0.014±0.0045   | M23C4       |
| 2-Methylpentane           | 0.071±0.045   | 0.16±0.083     | 0.081±0.032   | 0.052±0.015    | M2PE        |
| 3-Methylpentane           | 0.052±0.039   | 0.1±0.059      | 0.055±0.022   | 0.032±0.012    | M3PE        |
| Methyl tert-butyl ether   | 0.072±0.042   | 0.13±0.048     | 0.09±0.032    | 0.045±0.018    | MTBE        |
| 1-Hexene                  | 0.0048±0.0052 | 0.013±0.0036   | 0.0067±0.0055 | 0.0016±0.00095 | HEX1ENE     |
| n-Hexane                  | 0.066±0.043   | 0.12±0.057     | 0.07±0.033    | 0.044±0.022    | NC6H14      |
| Methacrolein              | 0.062±0.062   | 0.13±0.058     | 0.11±0.063    | 0.022±0.0091   | MACR        |
| 1,1-Dichloroethane        | 0.0086±0.0046 | 0.011±0.0057   | 0.011±0.005   | 0.0068±0.0037  | CHCL2CH3    |
| Butyraldehyde             | 0.54±0.21     | 0.46±0.17      | 0.48±0.15     | 0.57±0.23      | C3H7CHO     |
| 1,2-Dichloroethylene      | 0.049±0.076   | 0.12±0.15      | 0.046±0.033   | 0.03±0.02      | DICLETH     |
| 2-Butanone                | 0.25±0.24     | 0.53±0.43      | 0.27±0.12     | 0.16±0.077     | MEK         |
| Ethyl acetate             | 0.27±0.39     | 0.62±0.77      | 0.24±0.17     | 0.17±0.11      | ETHACET     |
| Chloroform                | 0.082±0.032   | 0.12±0.038     | 0.096±0.018   | 0.064±0.021    | CHCL3       |
| Methylchloroform          | 0.0021±0.0011 | 0.0037±0.00045 | 0.0019±0.0013 | 0.0016±0.00047 | CH3CCL3     |
| 2-Methylhexane            | 0.015±0.017   | 0.039±0.027    | 0.015±0.0075  | 0.0074±0.0027  | M2HEX       |
| Cyclohexane               | 0.019±0.015   | 0.038±0.019    | 0.021±0.015   | 0.011±0.0058   | CHEX        |
| Tetrachloromethane        | 0.073±0.0055  | 0.072±0.0048   | 0.07±0.0062   | 0.075±0.005    | CCL4        |
| 3-Methylhexane            | 0.02±0.024    | 0.054±0.041    | 0.019±0.01    | 0.0087±0.0033  | M3HEX       |
| Benzene                   | 0.35±0.14     | 0.36±0.15      | 0.4±0.15      | 0.31±0.13      | BENZENE     |
| Ethylene dichloride       | 0.36±0.17     | 0.33±0.17      | 0.4±0.19      | 0.33±0.17      | CH2CLCH2CL  |
| n-Heptane                 | 0.035±0.023   | 0.067±0.034    | 0.034±0.013   | 0.025±0.0064   | NC7H16      |
| Crotonaldehyde            | 0.45±0.14     | 0.47±0.0088    | 0.48±0.0064   | 0.39±0.21      | C3MDBAL     |
| Trichloroethene           | 0.021±0.023   | 0.051±0.036    | 0.024±0.017   | 0.01±0.0039    | TRICLETH    |
| 1,2-Dichloropropane       | 0.085±0.038   | 0.12±0.028     | 0.11±0.026    | 0.062±0.031    | CL12PROP    |
| Pantanal                  | 0.018±0.011   | 0.033±0.017    | 0.02±0.0075   | 0.014±0.005    | C4H9CHO     |
| 1,3-Dichloro-1-propene    | 0.0025±0.0011 | 0.0031±0.00081 | 0.0023±0.0014 | 0.0024±0.0011  | CLC3H4CL    |
| 4-Methyl-2-pentanone      | 0.0046±0.0073 | 0.017±0.0046   | 0.0055±0.006  | 0.0027±0.0047  | MIBK        |
| Toluene                   | 0.28±0.27     | 0.61±0.46      | 0.29±0.12     | 0.17±0.075     | TOLUENE     |
| n-Octane                  | 0.0093±0.0071 | 0.021±0.0063   | 0.0093±0.0065 | 0.0056±0.0018  | NC8H18      |
| 1,1,2-Trichloroethane     | 0.014±0.0097  | 0.015±0.01     | 0.019±0.013   | 0.011±0.006    | CH2CLCH2CL2 |
| Tetrachloroethylene       | 0.015±0.013   | 0.036±0.017    | 0.016±0.0045  | 0.0076±0.0029  | TCE         |
| 2-Hexanone                | 0.05±0.025    | 0.086±0.026    | 0.06±0.011    | 0.038±0.011    | HEX2ONE     |
| Hexanal                   | 0.041±0.022   | 0.074±0.023    | 0.05±0.0094   | 0.03±0.0086    | C5H11CHO    |
| 1,2-Dibromoethane         | 0.002±0.0016  | 0.0039±0.0013  | 0.0021±0.0016 | 0.0014±0.0011  | DIBRET      |
| Ethylbenzene              | 0.042±0.031   | 0.066±0.032    | 0.044±0.033   | 0.031±0.025    | EBENZ       |
| o-Xylene                  | 0.039±0.03    | 0.071±0.037    | 0.043±0.029   | 0.027±0.019    | OXYL        |
| Styrene                   | 0.02±0.013    | 0.032±0.0087   | 0.017±0.0096  | 0.01±0.007     | STYRENE     |
| Isopropylbenzene          | 0.006±0.0058  | 0.016±0.0026   | 0.0068±0.0058 | 0.0026±0.0012  | IPBENZ      |
| 1,1,2,2-Tetrachloroethane | 0.0031±0.0019 | 0.0053±0.0012  | 0.0037±0.0019 | 0.0022±0.0012  | CHCL2CHCL2  |
| n-Propylbenzene           | 0.0048±0.0045 | 0.012±0.0032   | 0.0058±0.0039 | 0.0021±0.0013  | PBENZ       |
| m-Ethyltoluene            | 0.0073±0.0067 | 0.017±0.0079   | 0.0087±0.0047 | 0.0036±0.0022  | METHTOL     |
| p-Ethyltoluene            | 0.0048±0.0047 | 0.012±0.0044   | 0.0056±0.0038 | 0.0023±0.0017  | PETHTOL     |
| 1,3,5-Trimethylbenzene    | 0.0051±0.0054 | 0.014±0.0052   | 0.0063±0.0037 | 0.002±0.0016   | TM135B      |
| n-Decane                  | 0.0031±0.0031 | 0.0083±0.0026  | 0.0034±0.0024 | 0.0014±0.00056 | NC10H22     |
| Benzaldehyde              | 0.0047±0.0044 | 0.012±0.0038   | 0.0055±0.0034 | 0.0021±0.0011  | BENZAL      |
| 1,2,4-Trimethylbenzene    | 0.0088±0.009  | 0.022±0.012    | 0.011±0.0049  | 0.0041±0.0022  | TM124B      |
| 1,2,3-Trimethylbenzene    | 0.0037±0.0035 | 0.0093±0.0036  | 0.0043±0.0023 | 0.0017±0.001   | TM123B      |
| Undecane                  | 0.0019±0.0024 | 0.0058±0.0012  | 0.0029±0.0017 | 0.0034±0.0051  | NC11H24     |
| Dodecane                  | 0.0094±0.0035 | 0.014±0.0034   | 0.008±0.0022  | 0.008±0.0024   | NC12H26     |

3

## 1 **Text S1 Modification for HO<sub>2</sub> measurement**

2 To measure the HO<sub>2</sub>, a valve was added to switch the injection gas between NO and  
3 N<sub>2</sub> gases as indicated by purple frame in Figure S2. When NO is added to the sample  
4 flow, the CIMS switches to HO<sub>2</sub> mode for total HO<sub>x</sub> measurement, whereas adding N<sub>2</sub>  
5 shifts it to OH mode for OH measurement. It should be noted that the increasing NO  
6 concentration can enhance HO<sub>2</sub> conversion (R11), but excessive NO levels trigger the  
7 HONO formation (R15), competing with the conversion process (R21) and lowering  
8 the detection efficiency. Consequently, the NO to SO<sub>2</sub> concentration ratio is crucial for  
9 HO<sub>2</sub> measurements. Sensitivity tests revealed an optimal [NO]/[SO<sub>2</sub>] ratio of 0.1 for  
10 the PolyU-CIMS, aligning with prior research recommendations (Edwards et al., 2003;  
11 Sjostedt et al., 2007).

## 12 **Text S2 Measurement interferences**

13 The concentration of injected NO is the primary source of HO<sub>2</sub> measurement  
14 interference in this study. High NO concentrations convert ambient RO<sub>2</sub>, particularly  
15 alkene and aromatic-related RO<sub>2</sub>, into HO<sub>2</sub> and then OH, leading to a positive bias in  
16 HO<sub>2</sub> measurements (Fuchs et al., 2014). To mitigate this interference, the NO  
17 concentration at the sample inlet was set to 1.2 ppm—lower than the levels  
18 recommended in previous studies to minimize RO<sub>2</sub> interference (Fuchs et al., 2014).  
19 Additionally, a box model was employed to quantify and subtract this interference from  
20 the observational results.

21 The OH interference in PolyU-CIMS, resulting from ambient HO<sub>2</sub> recycling (R11)  
22 and ionization process (R24, artificial OH), was accounted for and included in the  
23 measurement uncertainty, as outlined by Zou et al. (2023). However, in this study,  
24 PolyU-CIMS encountered additional interference from residual NO in the injectors  
25 when switching from NO (used for HO<sub>2</sub> measurement) to N<sub>2</sub> (used for OH  
26 measurement). To prevent residual NO buildup, the inlet was cleaned daily, and a one-  
27 hour calibration was performed at both the start and end of daily measurement to  
28 monitor the NO residuals. The monitoring results showed that the NO residual time for  
29 PolyU - CIMS was approximately 26 mins which is similar to the residual time reported

1 in earlier studies (Edwards et al., 2003; Sjostedt et al., 2007). Consequently, data  
2 collected during the residual period (30 mins after switching the measurement target  
3 from HO<sub>2</sub> to OH) were discarded to eliminate any NO residual interference from the  
4 final results.

5

## 6 **Reference**

- 7 Bottorff, B., Lew, M. M., Woo, Y., Rickly, P., Rollings, M. D., Deming, B., Anderson,  
8 D. C., Wood, E., Alwe, H. D., Millet, D. B., Weinheimer, A., Tyndall, G., Ortega, J.,  
9 Dusanter, S., Leonardis, T., Flynn, J., Erickson, M., Alvarez, S., Rivera-Rios, J. C.,  
10 Shutter, J. D., Keutsch, F., Helmig, D., Wang, W., Allen, H. M., Slade, J. H., Shepson,  
11 P. B., Bertman, S., and Stevens, P. S.: OH, HO<sub>2</sub>, and RO<sub>2</sub> radical chemistry in a rural  
12 forest environment: measurements, model comparisons, and evidence of a missing  
13 radical sink, *Atmospheric Chemistry and Physics*, 23, 10287–10311,  
14 <https://doi.org/10.5194/acp-23-10287-2023>, 2023.
- 15 Cho, C., Fuchs, H., Hofzumahaus, A., Holland, F., Bloss, W. J., Bohn, B., Dorn, H.-P.,  
16 Glowania, M., Hohaus, T., Liu, L., Monks, P. S., Niether, D., Rohrer, F., Sommariva,  
17 R., Tan, Z., Tillmann, R., Kiendler-Scharr, A., Wahner, A., and Novelli, A.:  
18 Experimental chemical budgets of OH, HO<sub>2</sub>, and RO<sub>2</sub> radicals in rural air in western  
19 Germany during the JULIAC campaign 2019, *Atmospheric Chemistry and Physics*, 23,  
20 2003–2033, <https://doi.org/10.5194/acp-23-2003-2023>, 2023.
- 21 Edwards, G. D., Cantrell, C. A., Stephens, S., Hill, B., Goyea, O., Shetter, R. E.,  
22 Mauldin, R. L., Kosciuch, E., Tanner, D. J., and Eisele, F. L.: Chemical Ionization Mass  
23 Spectrometer Instrument for the Measurement of Tropospheric HO<sub>2</sub> and RO<sub>2</sub>, *Anal.*  
24 *Chem.*, 75, 5317–5327, <https://doi.org/10.1021/ac034402b>, 2003.
- 25 Feiner, P. A., Brune, W. H., Miller, D. O., Zhang, L., Cohen, R. C., Romer, P. S.,  
26 Goldstein, A. H., Keutsch, F. N., Skog, K. M., Wennberg, P. O., Nguyen, T. B., Teng,  
27 A. P., DeGouw, J., Koss, A., Wild, R. J., Brown, S. S., Guenther, A., Edgerton, E.,  
28 Baumann, K., and Fry, J. L.: Testing Atmospheric Oxidation in an Alabama Forest,  
29 *Journal of the Atmospheric Sciences*, 73, 4699–4710, [https://doi.org/10.1175/JAS-D-](https://doi.org/10.1175/JAS-D-16-0044.1)  
30 16-0044.1, 2016.
- 31 Fuchs, H., Acir, I.-H., Bohn, B., Brauers, T., Dorn, H.-P., Häsel, R., Hofzumahaus, A.,  
32 Holland, F., Kaminski, M., Li, X., Lu, K., Lutz, A., Nehr, S., Rohrer, F., Tillmann, R.,  
33 Wegener, R., and Wahner, A.: OH regeneration from methacrolein oxidation  
34 investigated in the atmosphere simulation chamber SAPHIR, *Atmos. Chem. Phys.*, 14,  
35 7895–7908, <https://doi.org/10.5194/acp-14-7895-2014>, 2014.
- 36 Griffith, S. M., Hansen, R. F., Dusanter, S., Michoud, V., Gilman, J. B., Kuster, W. C.,  
37 Veres, P. R., Graus, M., Gouw, J. A., Roberts, J., Young, C., Washenfelder, R., Brown,  
38 S. S., Thalman, R., Waxman, E., Volkamer, R., Tsai, C., Stutz, J., Flynn, J. H., Grossberg,  
39 N., Lefer, B., Alvarez, S. L., Rappenglueck, B., Mielke, L. H., Osthoff, H. D., and

1 Stevens, P. S.: Measurements of hydroxyl and hydroperoxy radicals during CalNex-LA:  
2 Model comparisons and radical budgets, *J. Geophys. Res. Atmos.*, 121, 4211–4232,  
3 <https://doi.org/10.1002/2015JD024358>, 2016.

4 Jeong, D., Seco, R., Emmons, L., Schwantes, R., Liu, Y., McKinney, K. A., Martin, S.  
5 T., Keutsch, F. N., Gu, D., Guenther, A. B., Vega, O., Tota, J., Souza, R. A. F.,  
6 Springston, S. R., Watson, T. B., and Kim, S.: Reconciling Observed and Predicted  
7 Tropical Rainforest OH Concentrations, *JGR Atmospheres*, 127,  
8 <https://doi.org/10.1029/2020JD032901>, 2022.

9 Lew, M. M., Rickly, P. S., Bottorff, B. P., Reidy, E., Sklaveniti, S., Léonardis, T., Locoge,  
10 N., Dusanter, S., Kundu, S., Wood, E., and Stevens, P. S.: OH and HO<sub>2</sub> radical chemistry  
11 in a midlatitude forest: measurements and model comparisons, *Atmospheric Chemistry  
12 and Physics*, 20, 9209–9230, <https://doi.org/10.5194/acp-20-9209-2020>, 2020.

13 Ma, X., Tan, Z., Lu, K., Yang, X., Liu, Y., Li, S., Li, X., Chen, S., Novelli, A., Cho, C.,  
14 Zeng, L., Wahner, A., and Zhang, Y.: Winter photochemistry in Beijing: Observation  
15 and model simulation of OH and HO<sub>2</sub> radicals at an urban site, *Science of The Total  
16 Environment*, 685, 85–95, <https://doi.org/10.1016/j.scitotenv.2019.05.329>, 2019.

17 Mallik, C., Tomsche, L., Bourtsoukidis, E., Crowley, J. N., Derstroff, B., Fischer, H.,  
18 Hafermann, S., Hüser, I., Javed, U., Keßel, S., Lelieveld, J., Martinez, M., Meusel, H.,  
19 Novelli, A., Phillips, G. J., Pozzer, A., Reiffs, A., Sander, R., Taraborrelli, D., Sauvage,  
20 C., Schuladen, J., Su, H., Williams, J., and Harder, H.: Oxidation processes in the  
21 eastern Mediterranean atmosphere: evidence from the modelling of HO<sub>x</sub> measurements  
22 over Cyprus, *Atmospheric Chemistry and Physics*, 18, 10825–10847,  
23 <https://doi.org/10.5194/acp-18-10825-2018>, 2018.

24 Sanchez, D., Jeong, D., Seco, R., Wrangham, I., Park, J.-H., Brune, W. H., Koss, A.,  
25 Gilman, J., de Gouw, J., Misztal, P., Goldstein, A., Baumann, K., Wennberg, P. O.,  
26 Keutsch, F. N., Guenther, A., and Kim, S.: Intercomparison of OH and OH reactivity  
27 measurements in a high isoprene and low NO environment during the Southern Oxidant  
28 and Aerosol Study (SOAS), *Atmospheric Environment*, 174, 227–236,  
29 <https://doi.org/10.1016/j.atmosenv.2017.10.056>, 2018.

30 Sjostedt, S. J., Huey, L. G., Tanner, D. J., Peischl, J., Chen, G., Dibb, J. E., Lefter, B.,  
31 Hutterli, M. A., Beyersdorf, A. J., Blake, N. J., Blake, D. R., Sueper, D., Ryerson, T.,  
32 Burkhardt, J., and Stohl, A.: Observations of hydroxyl and the sum of peroxy radicals at  
33 Summit, Greenland during summer 2003, *Atmospheric Environment*, 41, 5122–5137,  
34 <https://doi.org/10.1016/j.atmosenv.2006.06.065>, 2007.

35 Slater, E. J., Whalley, L. K., Woodward-Massey, R., Ye, C., Lee, J. D., Squires, F.,  
36 Hopkins, J. R., Dunmore, R. E., Shaw, M., Hamilton, J. F., Lewis, A. C., Crilley, L. R.,  
37 Kramer, L., Bloss, W., Vu, T., Sun, Y., Xu, W., Yue, S., Ren, L., Acton, W. J. F., Hewitt,  
38 C. N., Wang, X., Fu, P., and Heard, D. E.: Elevated levels of OH observed in haze events  
39 during wintertime in central Beijing, *Atmospheric Chemistry and Physics*, 20, 14847–  
40 14871, <https://doi.org/10.5194/acp-20-14847-2020>, 2020.

- 1 Tan, Z., Fuchs, H., Lu, K., Hofzumahaus, A., Bohn, B., Broch, S., Dong, H., Gomm, S.,  
2 Häsel, R., He, L., Holland, F., Li, X., Liu, Y., Lu, S., Rohrer, F., Shao, M., Wang, B.,  
3 Wang, M., Wu, Y., Zeng, L., Zhang, Y., Wahner, A., and Zhang, Y.: Radical chemistry  
4 at a rural site (Wangdu) in the North China Plain: observation and model calculations  
5 of OH, HO<sub>2</sub> and RO<sub>2</sub> radicals, *Atmospheric Chemistry and Physics*, 17, 663–690,  
6 <https://doi.org/10.5194/acp-17-663-2017>, 2017.
- 7 Tan, Z., Rohrer, F., Lu, K., Ma, X., Bohn, B., Broch, S., Dong, H., Fuchs, H., Gkatzelis,  
8 G. I., Hofzumahaus, A., Holland, F., Li, X., Liu, Y., Liu, Y., Novelli, A., Shao, M., Wang,  
9 H., Wu, Y., Zeng, L., Hu, M., Kiendler-Scharr, A., Wahner, A., and Zhang, Y.:  
10 Wintertime photochemistry in Beijing: observations of RO<sub>x</sub> radical concentrations in  
11 the North China Plain during the BEST-ONE campaign, *Atmospheric Chemistry and  
12 Physics*, 18, 12391–12411, <https://doi.org/10.5194/acp-18-12391-2018>, 2018.
- 13 Tan, Z., Lu, K., Jiang, M., Su, R., Wang, H., Lou, S., Fu, Q., Zhai, C., Tan, Q., Yue, D.,  
14 Chen, D., Wang, Z., Xie, S., Zeng, L., and Zhang, Y.: Daytime atmospheric oxidation  
15 capacity in four Chinese megacities during the photochemically polluted season: a case  
16 study based on box model simulation, *Atmos. Chem. Phys.*, 19, 3493–3513,  
17 <https://doi.org/10.5194/acp-19-3493-2019>, 2019.
- 18 Tan, Z., Ma, X., Lu, K., Jiang, M., Zou, Q., Wang, H., Zeng, L., and Zhang, Y.: Direct  
19 evidence of local photochemical production driven ozone episode in Beijing: A case  
20 study, *Science of The Total Environment*, 800, 148868,  
21 <https://doi.org/10.1016/j.scitotenv.2021.148868>, 2021.
- 22 Wang, G., Iradukunda, Y., Shi, G., Sanga, P., Niu, X., and Wu, Z.: Hydroxyl,  
23 hydroperoxyl free radicals determination methods in atmosphere and troposphere,  
24 *Journal of Environmental Sciences*, 99, 324–335,  
25 <https://doi.org/10.1016/j.jes.2020.06.038>, 2021.
- 26 Whalley, L. K., Stone, D., Dunmore, R., Hamilton, J., Hopkins, J. R., Lee, J. D., Lewis,  
27 A. C., Williams, P., Kleffmann, J., Laufs, S., Woodward-Massey, R., and Heard, D. E.:  
28 Understanding in situ ozone production in the summertime through radical observations  
29 and modelling studies during the Clean air for London project (ClearfLo), *Atmos. Chem.  
30 Phys.*, 18, 2547–2571, <https://doi.org/10.5194/acp-18-2547-2018>, 2018.
- 31 Whalley, L. K., Slater, E. J., Woodward-Massey, R., Ye, C., Lee, J. D., Squires, F.,  
32 Hopkins, J. R., Dunmore, R. E., Shaw, M., Hamilton, J. F., Lewis, A. C., Mehra, A.,  
33 Worrall, S. D., Bacak, A., Bannan, T. J., Coe, H., Percival, C. J., Ouyang, B., Jones, R.  
34 L., Crilley, L. R., Kramer, L. J., Bloss, W. J., Vu, T., Kotthaus, S., Grimmond, S., Sun,  
35 Y., Xu, W., Yue, S., Ren, L., Acton, W. J. F., Hewitt, C. N., Wang, X., Fu, P., and Heard,  
36 D. E.: Evaluating the sensitivity of radical chemistry and ozone formation to ambient  
37 VOCs and NO<sub>x</sub> in Beijing, *Atmospheric Chemistry and Physics*, 21, 2125–2147,  
38 <https://doi.org/10.5194/acp-21-2125-2021>, 2021.
- 39 Woodward-Massey, R., Slater, E. J., Alen, J., Ingham, T., Cryer, D. R., Stimpson, L. M.,  
40 Ye, C., Seakins, P. W., Whalley, L. K., and Heard, D. E.: Implementation of a chemical  
41 background method for atmospheric OH measurements by laser-induced fluorescence:

1 characterisation and observations from the UK and China, Atmospheric Measurement  
2 Techniques, 13, 3119–3146, <https://doi.org/10.5194/amt-13-3119-2020>, 2020.

3 Zhang, G., Hu, R., Xie, P., Lu, K., Lou, S., Liu, X., Li, X., Wang, F., Wang, Y., Yang,  
4 X., Cai, H., Wang, Y., and Liu, W.: Intercomparison of OH radical measurement in a  
5 complex atmosphere in Chengdu, China, Science of The Total Environment, 838,  
6 155924, <https://doi.org/10.1016/j.scitotenv.2022.155924>, 2022a.

7 Zhang, G., Hu, R., Xie, P., Lou, S., Wang, F., Wang, Y., Qin, M., Li, X., Liu, X., Wang,  
8 Y., and Liu, W.: Observation and simulation of HO<sub>x</sub> radicals in an urban area in  
9 Shanghai, China, Science of The Total Environment, 810, 152275,  
10 <https://doi.org/10.1016/j.scitotenv.2021.152275>, 2022b.

11 Zou, Z., Chen, Q., Xia, M., Yuan, Q., Chen, Y., Wang, Y., Xiong, E., Wang, Z., and  
12 Wang, T.: OH measurements in the coastal atmosphere of South China: possible  
13 missing OH sinks in aged air masses, Atmospheric Chemistry and Physics, 23, 7057–  
14 7074, <https://doi.org/10.5194/acp-23-7057-2023>, 2023.
