# Supplementary material for: Observation and modelling of atmospheric OH and HO 2 radicals at a subtropical rural site and implications for secondary pollutants
Source: Copernicus journal article supplement (doi:10.5194/egusphere-2024-3210), 2024-10-18
Supplement: Supplementary file [file egusphere-2024-3210-AC3-supplement.pdf]

**Response to Reviewers' Comments on Manuscript ID egosphere-2024-3210:  
"Observation and modelling of atmospheric OH and HO<sub>2</sub> radicals at a  
subtropical rural site and implications for secondary pollutants"**

We sincerely appreciate the editor and the three referees for thoughtful comments and valuable suggestions which has helped us to improve our manuscript. In response to your comments, we have undertaken a comprehensive revision of the manuscript.

Please find our itemized responses below and revisions in the re-submitted files. We use *italicized* text for your questions, **blue** for our response, and **red** to indicate where changes have been made in the manuscript. The changes inside the manuscript will be highlighted **in yellow**.

**Reviewer 3**

*The manuscript reports about CIMS measurements of OH and HO<sub>2</sub> in a subtropical rural site and the comparison of them with the results of MCM box model. Although in general simultaneous measurements of OH and HO<sub>2</sub> provide very helpful information for understanding of radical budgets and the article reporting such measurements would potentially be of an interest, the present study cannot be published in its present form because it actually does not report HO<sub>2</sub> measurements. The method used in this study for detection of peroxy radicals by their conversion to OH in reaction with added NO will result in about the same conversion efficiency for both HO<sub>2</sub> and organic peroxy radicals RO<sub>2</sub>. To distinguish between the HO<sub>2</sub> and RO<sub>2</sub> radicals using the conversion scheme with NO several groups previously developed CIMS methods based on a modulation of chemical conditions in their instruments to measure either HO<sub>2</sub> or RO<sub>2</sub>, predominantly (Hanke et al., 2002; Edwards et al., 2003; Hornbrook et al., 2011). In brief, HO<sub>2</sub> mode requires efficient suppression of RO<sub>2</sub> to HO<sub>2</sub> conversion in reaction of alkoxy (RO) radicals with O<sub>2</sub> in favor of the formation of alkyl nitrites:*

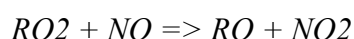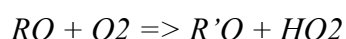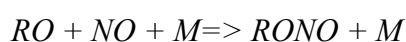

*Although the authors of the present manuscript make reference to the study of Edwards et al., 2003, they use NO concentration of 1.2 ppm leading to about 90% conversion of RO to HO<sub>2</sub> and resulting in similar contribution of HO<sub>2</sub> and RO<sub>2</sub> to the detected signal, assuming their similar ambient concentrations. Referring in the manuscript supplement to the study of Fuchs, 2014 as an example of using the same NO concentration of 1.2 ppm for HO<sub>2</sub> detection the authors do not take into account low pressure in the FAGE conversion stage, hence low O<sub>2</sub>, making RO+O<sub>2</sub> reaction negligible and allowing HO<sub>2</sub> measurements with low interference from RO<sub>2</sub>, although not for all of RO<sub>2</sub> (Fuchs et al., 2011). Finally, the authors do mention once "interference" from RO<sub>2</sub> by saying that "To access HO<sub>2</sub> interference caused by the ambient RO<sub>2</sub> conversion, the model underwent a three-days spins-up to simulate the ambient RO<sub>2</sub> concentration". However, it doesn't seem to be a correct procedure to make correction using the model and after*

*that compare the measurements corrected in this way with the same model.*

*The present OH and “HO<sub>2</sub>” measurements may still be of value and present the basis of an important publication. However, for this the measurements should be correctly interpreted and presented with detailed description of a calibration procedure of the peroxy radicals.*

**Response:** Thank you for your insightful comment. In our study, both the experimental and modelling results did not show significant RO<sub>2</sub> interference under our environmental conditions. Therefore, we consider our measurements to be representative of ambient HO<sub>2</sub> concentration.

The details were added to the revised manuscript on page 7:

“Interference from RO<sub>2</sub> can affect HO<sub>2</sub> measurements, potentially resulting in an overestimation of ambient HO<sub>2</sub> levels (Edwards et al., 2003; Fuchs et al., 2014; Hanke et al., 2002). In our study, both the experimental and modelling results did not show significant interference under our environmental conditions (Text S4.3).”

The contents were added an Text S4.3 on page 11 on SI as below:

“To assess the possible HO<sub>2</sub> interference from RO<sub>2</sub>, we first simulated with a box model production of HO<sub>2</sub> from RO<sub>2</sub> in the inlet system with addition of 1.2 ppm NO to ambient air composition observed in previous field study in Hok Tsui (a coastal site in Hong Kong) by our team in 2020 (Zou et al., 2023) before this observation. The observation-constrained MCM model (described in the Text S6) was run for three days, and the RO<sub>2</sub> outputs were taken as used as the initial concentrations entering the inlet. Then another model run was conducted by setting j-values setting to zero and reaction time as the residence time (47 ms) to simulate the conversion of RO<sub>2</sub> by NO in the CIMS inlet. We compared the OH concentrations (from RO<sub>2</sub> conversion to HO<sub>2</sub> and then to OH) at the outlet with the total concentration of HO<sub>2</sub>+OH after spinning up. The result shows a difference of less than 2% suggesting negligible conversation of RO<sub>2</sub> to HO<sub>2</sub> in the inlet at 1.2 ppm NO injection. Similar model tests with real time conditions were also done for Conghua study after field study and show less than 2% interference.

To verify the model results, experiment tests were conducted in both laboratory and field settings (Hok Tsui in Hong Kong and Conghua) by comparing the HO<sub>2</sub> calibration factor obtained in synthetic air (with minimal interference of RO<sub>2</sub> due to very low VOCs concentrations in the synthetic air) and that conducted in indoor and outdoor air (with potential interference due to presence of VOCs). The results in Table S6 show difference of 1% - 3% between the HO<sub>2</sub> calibration factor in the synthetic air with that in the lab indoor air and that in the ambient air at Hok Tsui (with [O<sub>3</sub>] <70 ppb [NO<sub>x</sub>] < 10 ppb) as well as Cong Hua (with [O<sub>3</sub>] <60 ppb [NO<sub>x</sub>] < 10 ppb), confirming little interference of RO<sub>2</sub> to HO<sub>2</sub> measurements (See Table S6 below). These results might be due to the low concentrations of biogenic volatile organic compounds (BVOCs) in our two study sites ([C<sub>5</sub>H<sub>8</sub>] <0.2 ppb) as previous studies show large interference of BVOC than anthropogenic VOC to HO<sub>2</sub> measurements (Fuchs et al., 2014).

**Table S5** Calibration factors of OH and HO<sub>2</sub> obtained in different conditions to estimate the RO<sub>2</sub> interference.

| Year of experiments | Calibration Conditions    | Calibration Factor (cm <sup>3</sup> ) |                 | Notes               |
|---------------------|---------------------------|---------------------------------------|-----------------|---------------------|
|                     |                           | OH                                    | HO <sub>2</sub> |                     |
| 2021                | Synthetic air in lab      | 7.912E-10                             | 9.156E-10       | On the afternoon of |
|                     | Indoor air in lab         | 8.146E-10                             | 9.275E-10       | <u>Nov 20, 2021</u> |
|                     | Synthetic air at Hok Tsui | 8.212E-10                             | 9.181E-10       | On the morning of   |
|                     | Outdoor air at Hok Tsui   | 8.252E-10                             | 9.378E-10       | <u>Dec 23, 2021</u> |
| 2022                | Synthetic air in lab      | 1.043E-09                             | 1.080E-09       | On the morning of   |
|                     | Indoor air in lab         | 1.035E-09                             | 1.119E-09       | <u>May 04, 2022</u> |
|                     | Synthetic air at Conghua  | 1.033E-09                             | 1.085E-09       | On the morning of   |
|                     | Outdoor air at Conghua    | 1.025E-09                             | 1.092E-09       | <u>Nov 17, 2022</u> |

Notes:

The difference between calibration factors obtained at 2022 and 2020 is due to the changes of CIMS's settings

Chemical Condition of outdoor air of Hok Tsui [O<sub>3</sub>] <70 ppb, [NO<sub>x</sub>] < 10 ppb, [C<sub>5</sub>H<sub>8</sub>] < 0.2 ppb

Chemical Condition of outdoor air of Cong Hua [O<sub>3</sub>] <60 ppb, [NO<sub>x</sub>] < 10 ppb, C<sub>5</sub>H<sub>8</sub> < 0.2 ppb

”

As to the referee's comment on our correction of interference by comparing model and observations, the correction affected concentrations of less than 2%. We agree with the referee that this correction is take account for partial interference. However, the small correction is consistent with the test results shown above indicating minimal interference of RO<sub>2</sub> to HO<sub>2</sub> during the field study.

The following modification have been made on page 14 of SI as below:

**“Text S6 The model efforts to correct measurement interference.**

Ambient NO can cause interference to OH measurement by concerting HO<sub>2</sub> to OH in the inlet system. To assess and correct this effect, model simulations were conducted, which also simulated conversion of RO<sub>2</sub> to HO<sub>2</sub> by NO (i.e., interference to HO<sub>2</sub> measurements as discussed before). We first constrained all measured species (except OH and HO<sub>2</sub>) in the model, and a three-day spin-up was used to simulate the chemical conditions of the sampled air during measurement. Then the outputs were used as inputs for another simulation with the injection gases (SO<sub>2</sub> and/or NO) to simulate chemical reactions in the inlet with reaction time of 47 ms to match the reaction time in the CIMS. Photolysis frequencies were maintained at zero to reflect the dark environment of the inlet. The modeled OH concentrations without NO addition and OH concentrations with NO addition represent ambient NO interference to OH and HO<sub>2</sub>, respectively.

The calculated interferences for OH and HO<sub>2</sub> measurements were in the range 1×10<sup>4</sup> cm<sup>-3</sup> to 1×10<sup>5</sup> cm<sup>-3</sup> (mean: 3×10<sup>4</sup>) and 8×10<sup>5</sup> cm<sup>-3</sup> to 2×10<sup>6</sup> cm<sup>-3</sup> (mean: 1.2×10<sup>6</sup>), respectively. These lead to correction of measurement data of OH and HO<sub>2</sub> less than 2%.”
